# Supplementary material for: Fabrication of multiple molecular logic gates made of fluorescent DNA-templated Au nanoclusters
Source: Royal Society of Chemistry journal article supplement (doi:10.1039/d0nj06192a), 2021-01-01
Supplement: d0nj06192a1.pdf [file d0nj06192a1.pdf]

**Electronic Supplementary Information (ESI)**  
**For**  
**Fabrication of multiple molecular logic gates made of**  
**fluorescent DNA templated-Au nanoclusters**

Hai-Bo Wang,\* An-Li Mao, Bei-Bei Tao, Hong-Ding Zhang,  
Yan-Ming Liu

*College of Chemistry and Chemical Engineering, Institute for Conservation and Utilization of Agro-bioresources in Dabie Mountains, Xinyang Normal University, Xinyang 464000, China*

---

\* Corresponding author. Tel.: +86 376 6391172; Fax: +86 376 6391172.

E-mail address: wanghaibohn@163.com (H.-B. Wang).

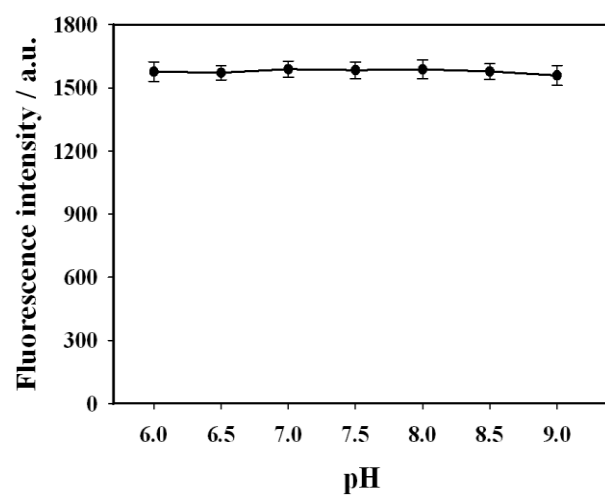

**Fig. S1** The effect of pH value on the fluorescence intensity of A30 DNA-AuNCs.

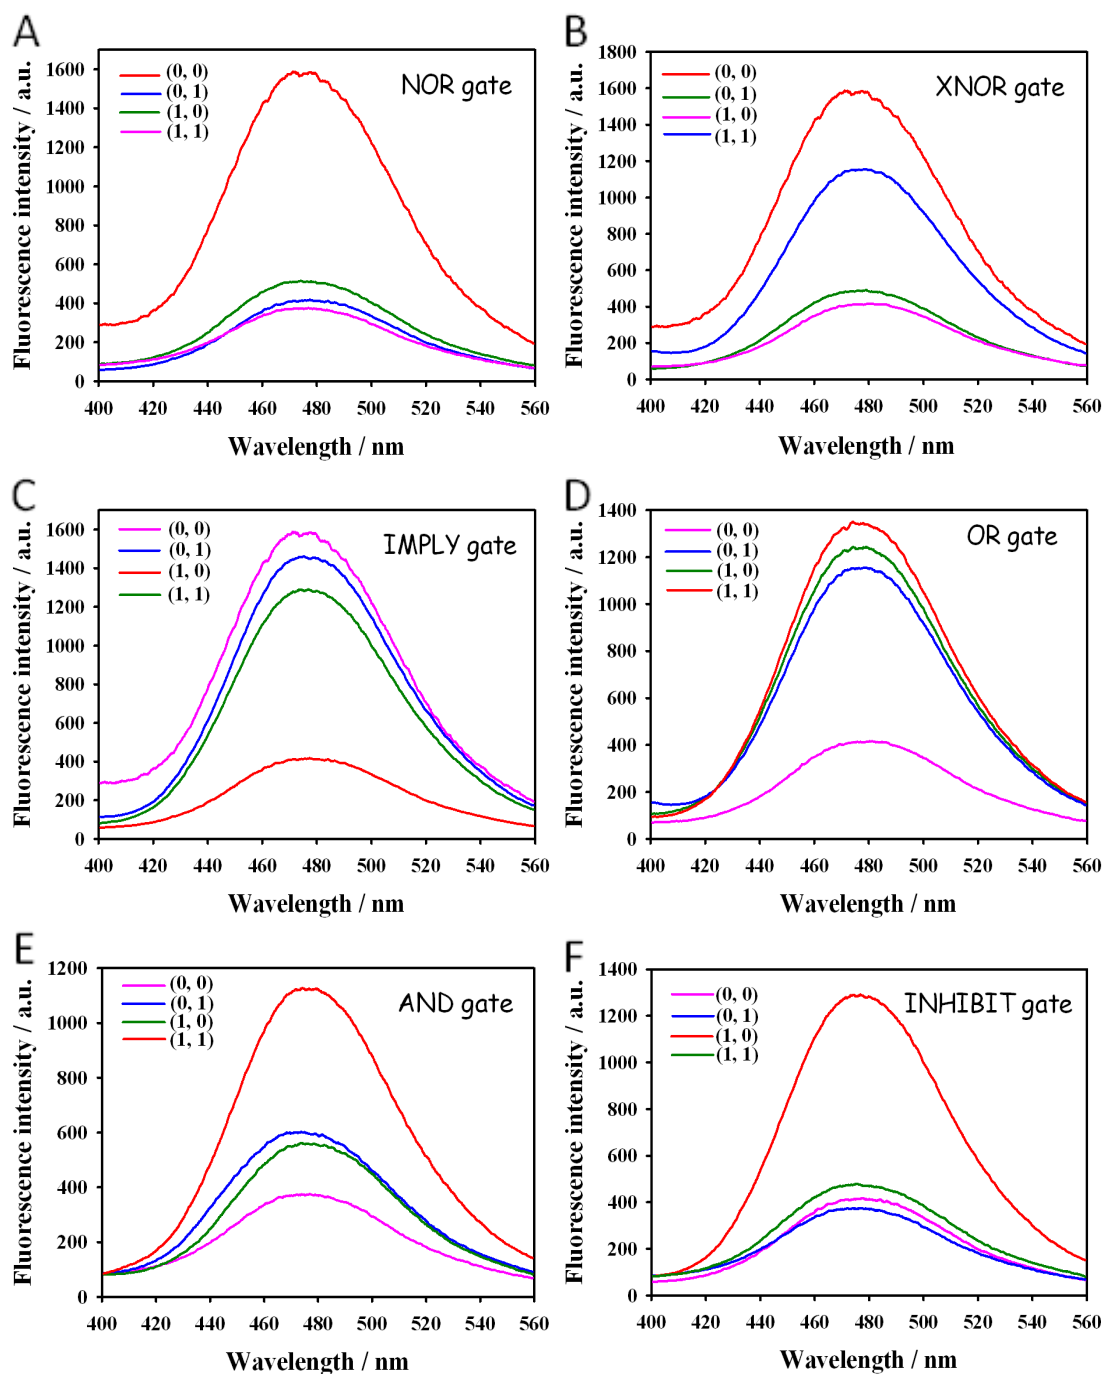

**Fig. S2** (A) The fluorescence emission spectra for the NOR gate triggered by using  $\text{Hg}^{2+}$  and  $\text{Cu}^{2+}$  as inputs. (B) The fluorescence emission spectra for the XNOR gate triggered by using  $\text{Hg}^{2+}$  and biothiols as inputs. (C) The fluorescence emission spectra for the IMPLY gate triggered by using  $\text{Hg}^{2+}$  and melamine as inputs. (D) The fluorescence emission spectra for the OR gate triggered by using biothiols and melamine as inputs. (E) The fluorescence emission spectra for the AND gate triggered by using melamine and ppi as inputs. (F) The fluorescence emission spectra for the INHIBIT gate triggered by using  $\text{Cu}^{2+}$  and melamine as inputs.

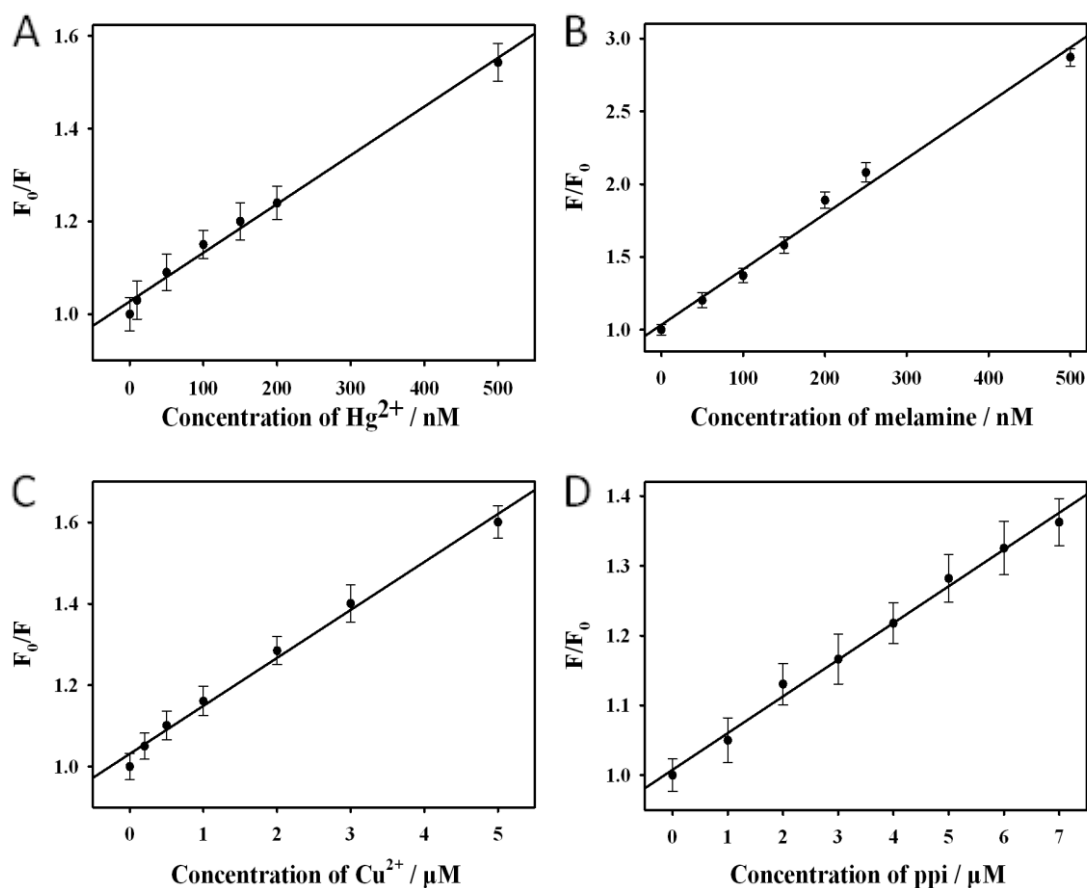

**Fig. S3** (A) The calibration plot between fluorescence response ( $F_0/F$ ) and  $Hg^{2+}$  concentrations. (B) The calibration plot between fluorescence response ( $F/F_0$ ) and melamine concentrations. (C) The calibration plot between fluorescence response ( $F_0/F$ ) and  $Cu^{2+}$  concentrations. (D) The calibration plot between fluorescence response ( $F/F_0$ ) and ppi concentrations.

Fig. S3 displays the good linear relationship between fluorescence response and target (including  $Hg^{2+}$ , melamine, ppi and  $Cu^{2+}$ ) concentrations. Based on the rule of signal to noise (S/N) ratio of 3, the limit of detection of DNA-AuNCs for  $Hg^{2+}$ , melamine,  $Cu^{2+}$  and ppi were calculated to be 3 nM, 15 nM, 60 nM, 350 nM, respectively.
